# Supplementary material
Source: PubMed Central journal article supplement (PMC7038247)
Supplement: AAC.01909-19-s0001.pdf [file AAC.01909-19-s0001.pdf]

**Supplementary Figures for 'Forging new antibiotic combinations under iron-limiting conditions'**

Derek C. K. Chan, Irene Guo, and Lori L. Burrows.

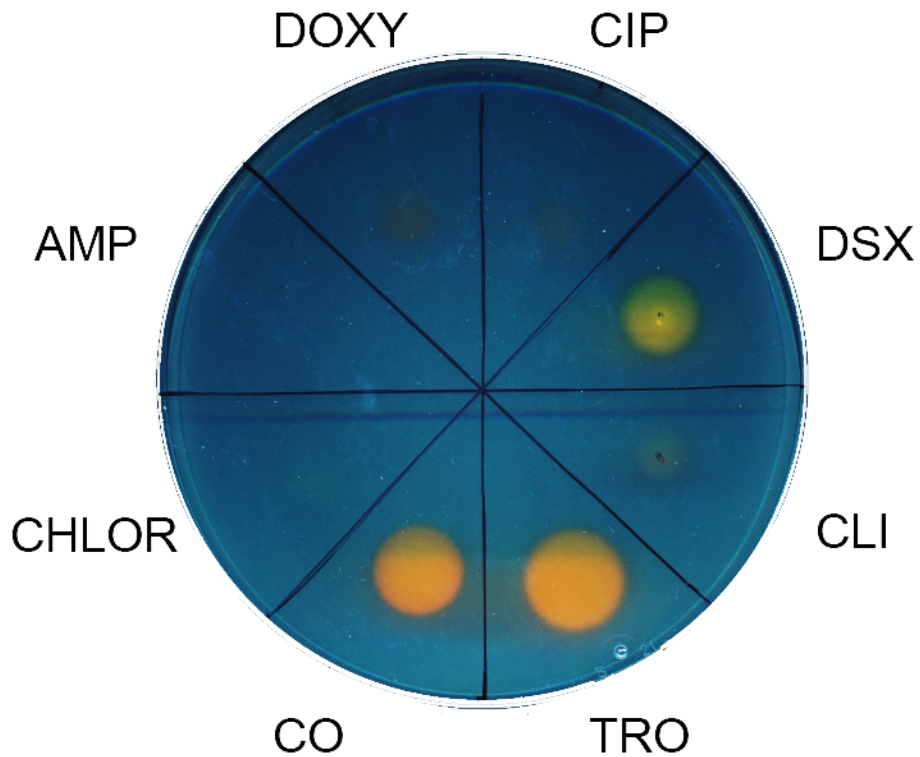

**Supplementary Figure S1: CAS assay of potential iron chelators.** A representative plate is shown.

Doxycycline (DOXY), ciprofloxacin (CIP), deferasirox (DSX), clioquinol (CLI), tropolone (TRO), ciclopirox olamine (CO), chloramphenicol (CHLOR), and ampicillin (AMP) were standardized to 2mg/mL. Ten  $\mu$ L was spotted in each sector. The plate was incubated at room temperature for 1 h. CLI precipitated on the surface of the agar. DSX served as a positive control. CHLOR and AMP were negative controls. Decolourization was not observed for CLI due to precipitation.

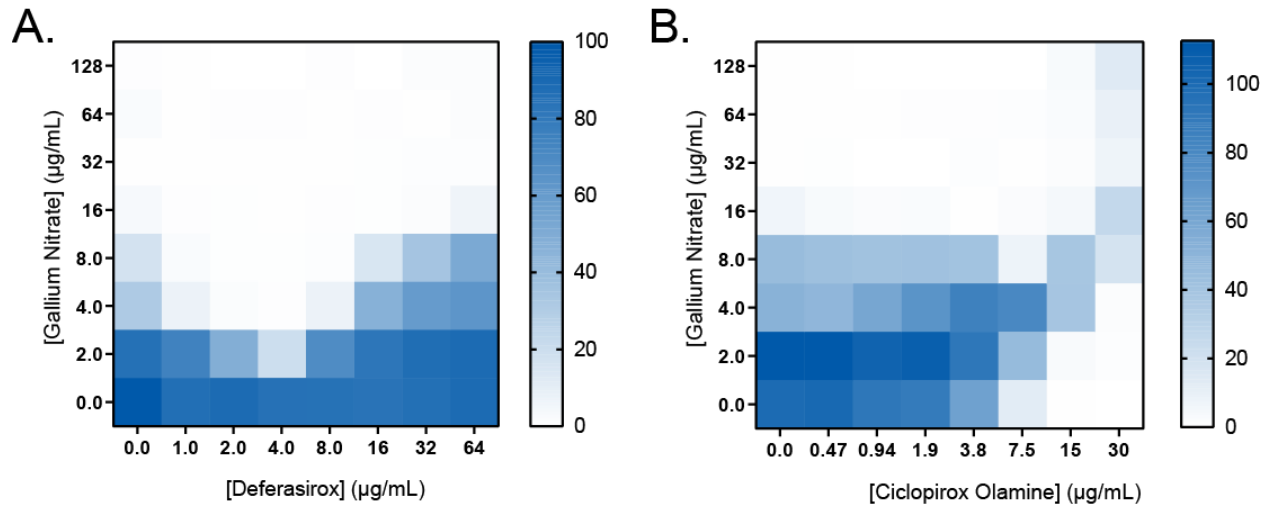

**Supplementary Figure S2: Iron chelators antagonise GN. A.** GN + DSX and **B.** GN + CO. DSX with GN has an additive effect at low concentrations but antagonizes at higher concentrations. The average of three independent experiments are shown for each checkerboard.

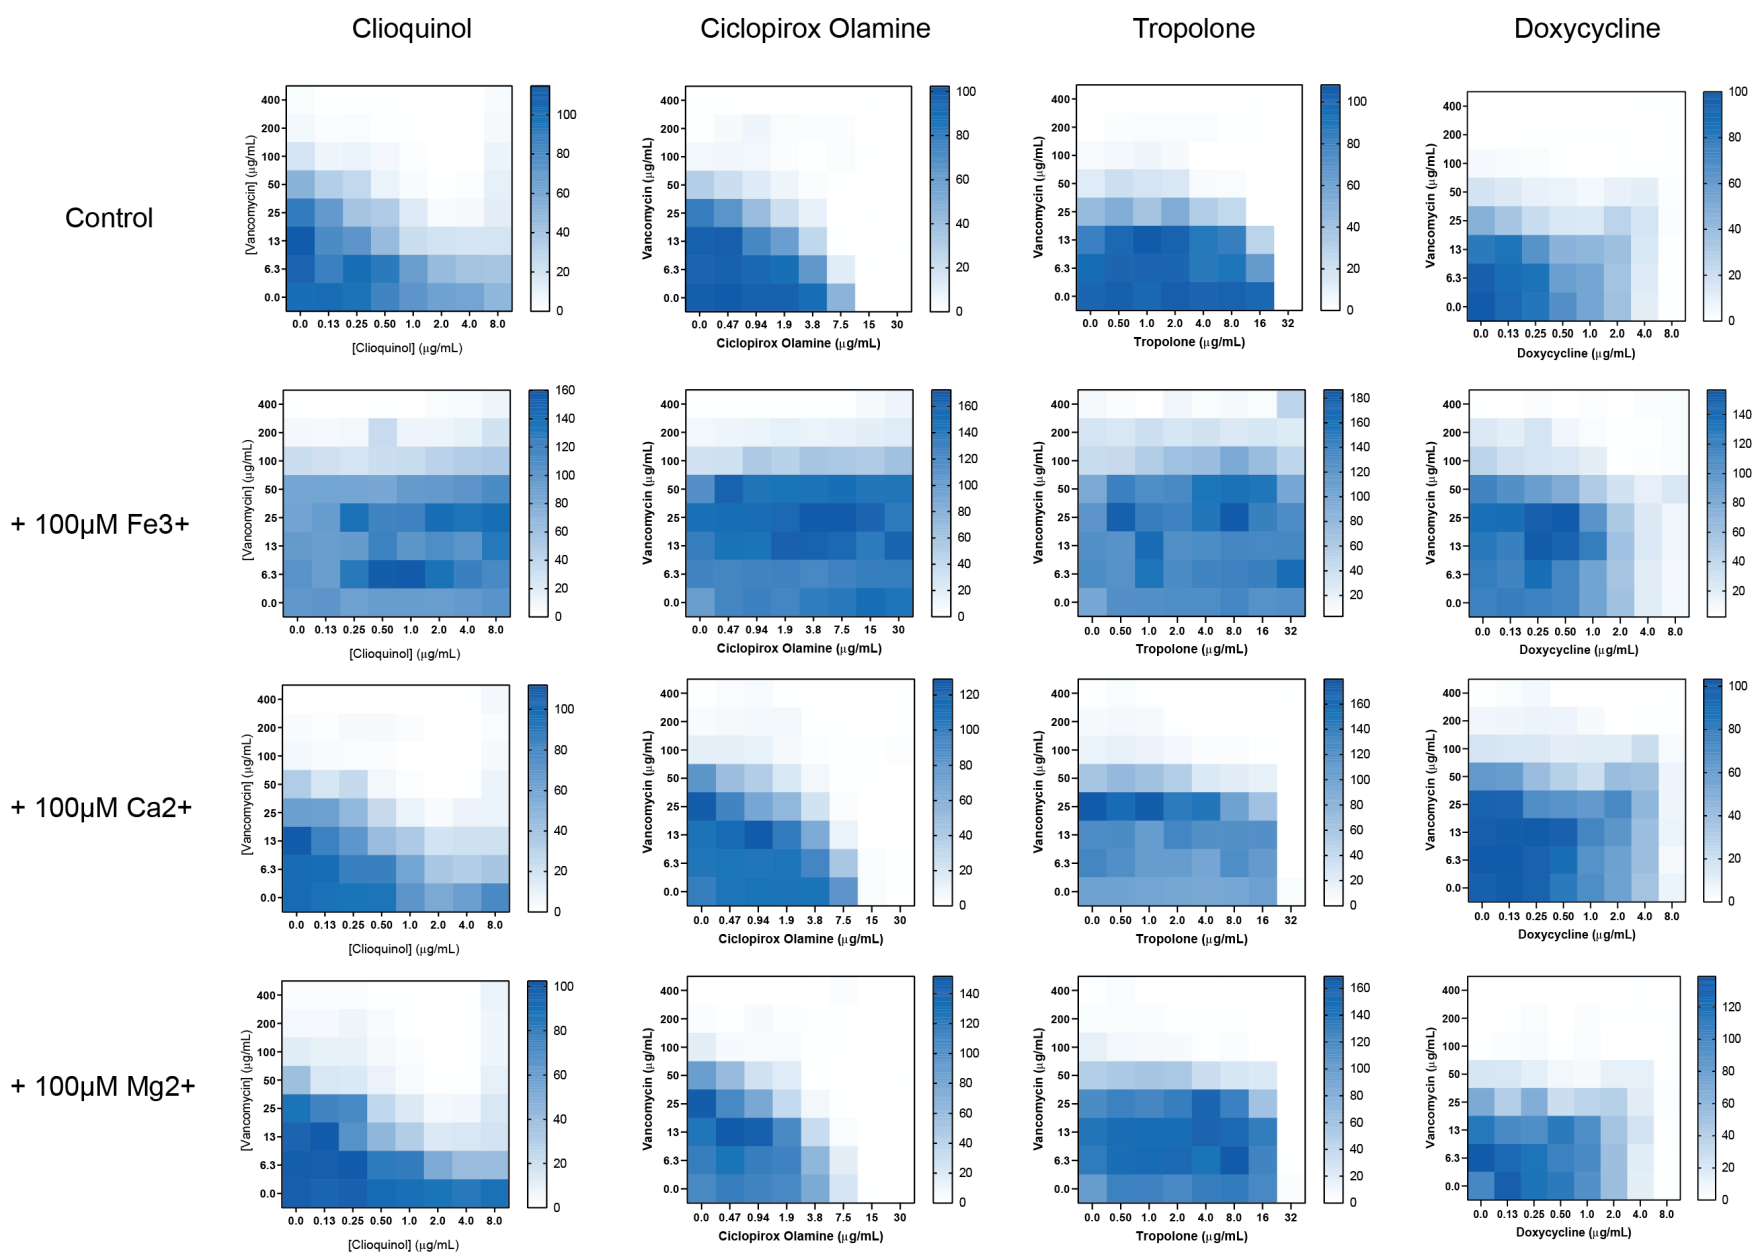

**Supplementary Figure S3: Addition of 100  $\mu\text{M}$   $\text{FeCl}_3$  reduces the inhibitory activity of potential chelators.** Vancomycin (VAN) + compound checkerboards are shown. None of the compounds synergized with VAN although an additive effect was seen with some compounds. The additive effect was abrogated by the addition of  $\text{FeCl}_3$  but not  $\text{MgCl}_2$  or  $\text{CaCl}_2$ , indicating that the effects of calcium and magnesium ion chelation from the outer membrane is minimal. The average of three independent repeats are shown for each checkerboard.

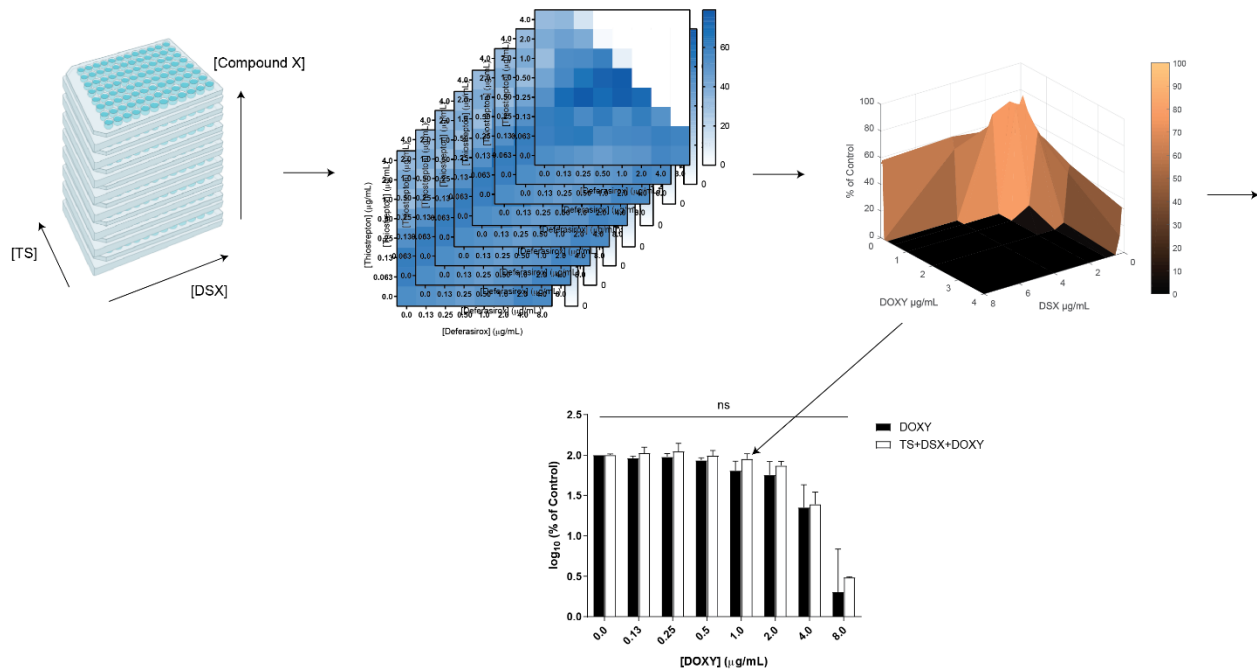

**Supplementary Figure S4. Configuration and interpretation of 3D checkerboards.** Three-dimensional checkerboards were arrayed in an  $8 \times 8 \times 8$  format (plate diagram created with BioRender). Each plate had identical serial dilutions of TS and DSX and a single concentration of the third compound. The direction of the arrows indicates increasing TS, DSX, or chelator concentration. Using MATLAB, each checkerboard was plotted in 3D with the % of control growth in the z-axis. The surface area of the checkerboard was calculated and expressed in terms of % of control, which was plotted against the third drug concentration. These data were compared to the dose-response curve of the third compound alone and the datasets compared using Graphpad Prism to identify statistically significant differences using 2-way ANOVA.

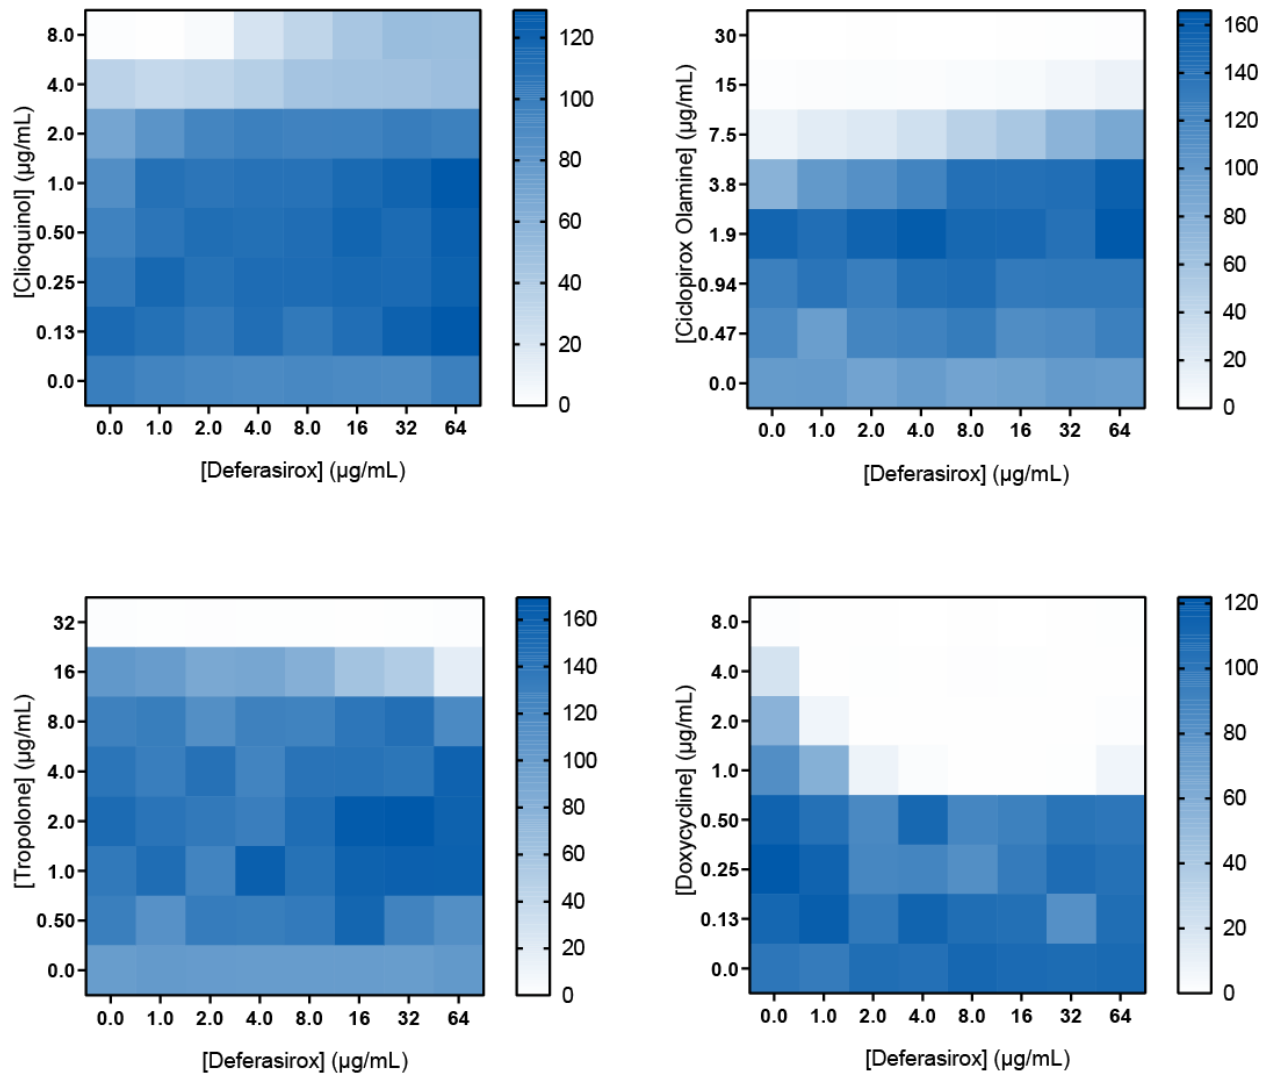

**Supplementary Figure S5: DSX and putative iron chelators show no synergy against *P. aeruginosa***

**PA14. A.** DSX + Clioquinol. **B.** DSX + CO. **C.** DSX + TRO. **D.** DSX + DOXY. DSX was additive to DOXY and

indifferent with CO and TRO. DSX showed antagonism with CLI at the highest concentration tested.

Higher concentrations were not tested because CLI precipitates above 8  $\mu\text{g/mL}$  in aqueous media. The

average of three independent experiments are shown for each checkerboard.

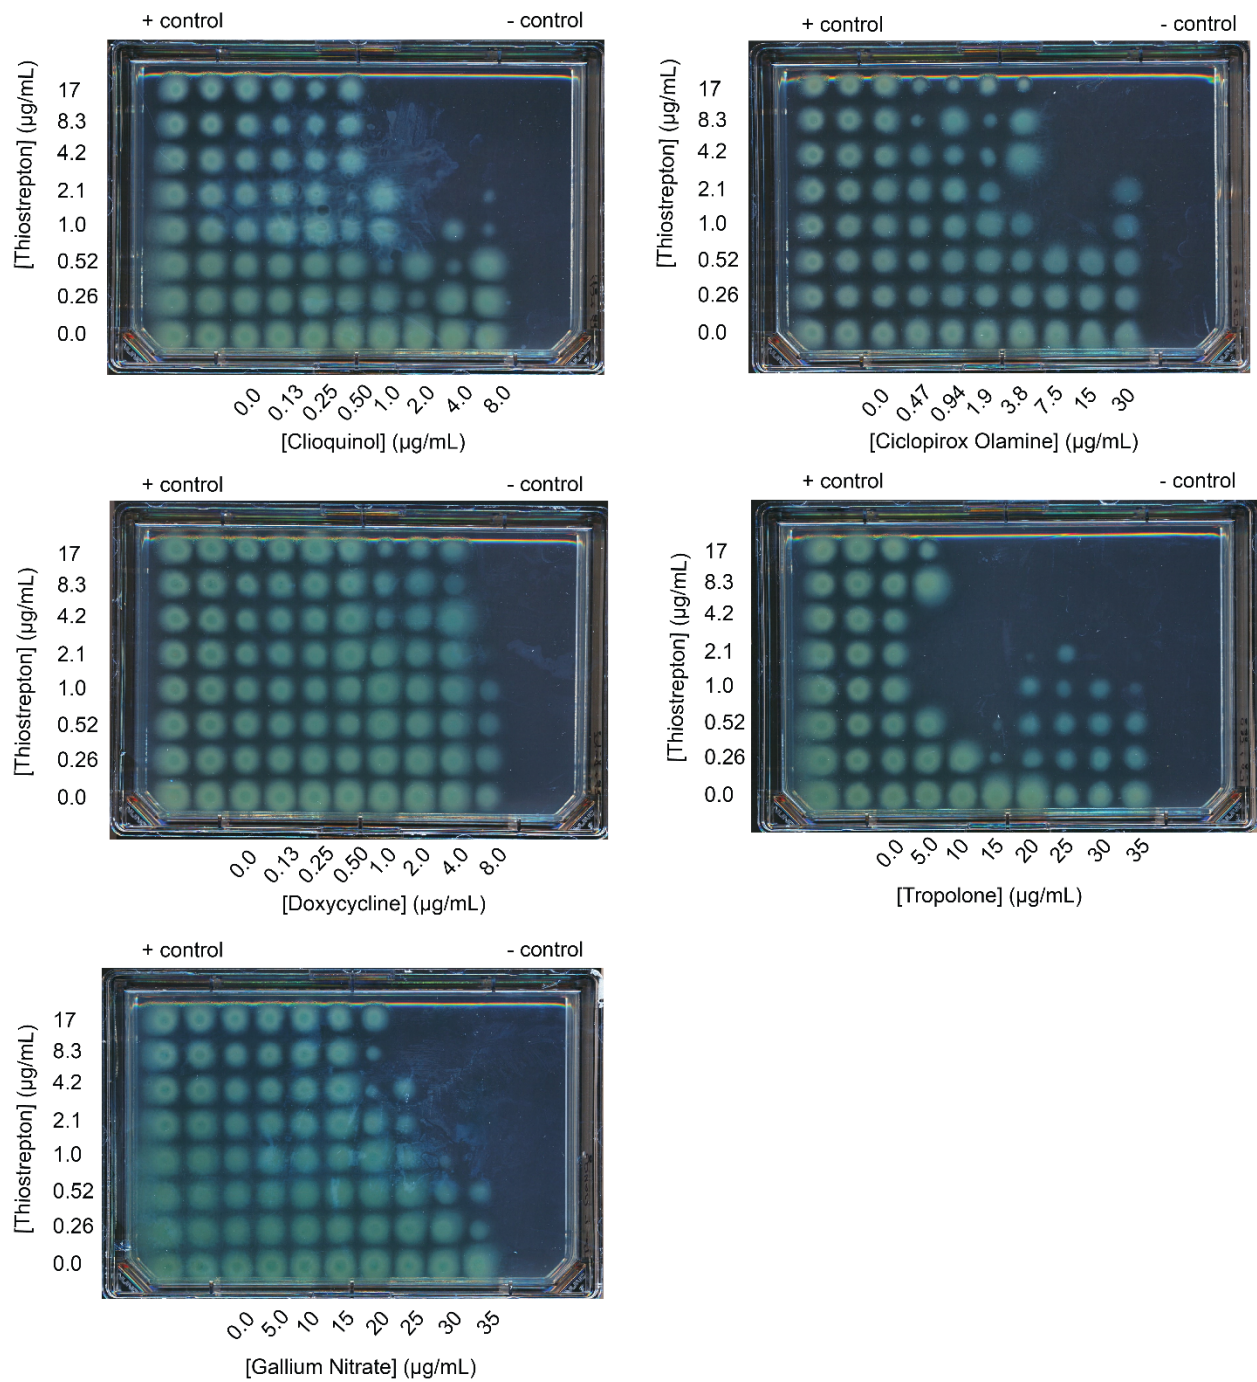

**Supplementary Figure S6: TS combinations are bactericidal.** Checkerboards were pinned to LB agar plates using a sterile 96 pin tool. Plates were incubated overnight at 37°C. Independent experiments were conducted 3 times and a representative plate is shown.

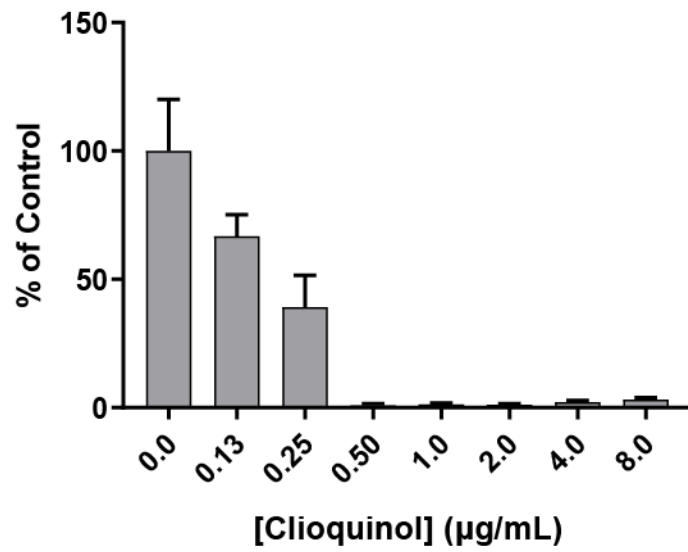

Supplementary Figure S7: *A. baumannii* C0286 is susceptible to CLI at low concentrations. The average of 3 independent experiments is shown.
